# Supplementary material
Source: ML conference proceedings conference paper supplement (https://openaccess.thecvf.com/content/CVPR2023/html/Zhang_Improving_Graph_Representation_CVPR_2023_paper.html)
Supplement: Supplementary file 1 [file Zhang_Improving_Graph_Representation_CVPR_2023_supplemental.pdf]

# Improving Graph Representation for Point Cloud Segmentation via Attentive Filtering

## Supplementary Material

### 1. Implementation Details

**GCN Block and GAF Block.** We construct the GCN block and the GAF block by combining a GCN/GAF and a separated MLP. Besides, we adopt residual connections in the GCN/GAF blocks. For a better understanding, we give the formulation of our Graph Attentive Filter again and give a detailed description as follows:

$$\mathbf{F}^{l+1} = \sigma(\text{FFN}(\mathcal{R} \cdot \hat{\mathbf{A}})) \diamond \Phi(\mathbf{F}^l), \quad (1)$$

where FFN is a feed-forward network to further learn the relation,  $\cdot$  represents element-wise multiplication and the symmetric adjacency matrix  $\hat{\mathbf{A}}$  is repeated to fit the correlation matrix  $\mathcal{R} \in \mathbb{R}^{N \times N \times C}$ , where  $C$  is the dimension of the point features  $\mathbf{F}^l$ .  $\Phi$  represents the non-linear feature transformation and  $\sigma$  is a normalization operator.  $\diamond$  is the graph aggregation operation. Our GAF estimate channel-wise edge relations  $\tilde{\mathcal{R}} = \sigma(\text{FFN}(\mathcal{R} \cdot \hat{\mathbf{A}}))$ , and we give a detailed formulation of the channel-wise graph aggregation as follows:

$$\mathbf{F}_{ij}^{l+1} = \text{Pooling}_k(\tilde{\mathcal{R}}_{ikj} \Phi(\mathbf{F}^l)_{kj}). \quad (2)$$

In practice, we use the softmax function as normalization. For computational efficiency, the channel-wise estimated correlations are shared for every 8 channels.

**Network Architectures.** Figure 1 illustrates the detailed design of our segmentation heads for part segmentation and semantic segmentation. The part segmentation head is constructed following CurveNet [40].

### 2. More Experimental Results

We report the results on Toronto-3D [33] in table 1. Toronto-3D is a large-scale dataset for outdoor scene segmentation, which covers about 1KM of urban roadways with 8 categories. 78.3 million points are scanned by mobile LiDAR systems. Compared with the indoor datasets, Toronto-3D contains more noise. We split Toronto-3D into  $5\text{m} \times 5\text{m}$  blocks and sampled 2048 points from each block following previous works [19,20]. We normalize each point cloud into the unit block, and the initial radius  $r$  is set to 0.05m. The sampling rate in each stage is set to 2.

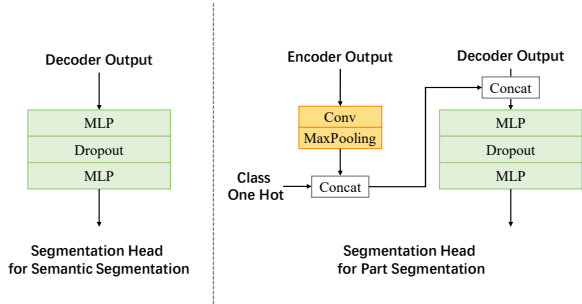

Figure 1. Architectures of segmentation heads.

We report per-class results and compare more methods on S3DIS [1] in Table 3 and Table 4. Our methods outperform previous methods in both Area-5 and 6-fold cross-validation. Compared with the previous SOTA Stratified Transformer [14], our AF-GCN is 22.2% faster in inference and  $10\times$  faster in training. We also report per-class results on ScanNetV2 [5]. Compared with the S3DIS dataset, points in ScanNetV2 are relatively sparse and the voxel-based methods usually obtain better performance. As shown in Table 5, our method outperforms recent point-based methods. We report per-class results on ShapeNet-Part [43] in Table 2. Our method outperforms others both in category mIoU and instance mIoU. More visualization is shown in Figure 2.

We also conduct experiments for object classification on ScanObjectNN [37]. We reported the best performance we obtained (OA:88.2, mAcc:86.2), with no significant improvement from baselines. Since the classification task does not require a decoder, and the input scale is so small (1024) that the global features are less affected by "distant" neighbors, we did not discuss it in the main text.

### 3. Limitation and Future Work

**Limitation.** Our method obtains competitive performance in multiple point cloud segmentation datasets. However, compared with the voxel-based methods or the point-based methods using voxel-like processing techniques, our method obtains a relatively lower performance in deal-

| Methods (time order) | OA           | mIoU         | Road         | Rd mrk.      | Natural      | Building     | Util. line   | Pole         | Car          | Fence        |
|----------------------|--------------|--------------|--------------|--------------|--------------|--------------|--------------|--------------|--------------|--------------|
| PointNet++ [30]      | 92.56        | 59.47        | 92.90        | 0.00         | 86.13        | 82.15        | 60.96        | 62.81        | 76.41        | 14.43        |
| DGCNN [38]           | 94.24        | 61.79        | 93.88        | 0.00         | 91.25        | 80.39        | 62.40        | 62.32        | 88.26        | 15.81        |
| MS-PCNN [27]         | 90.03        | 65.89        | 93.84        | 3.83         | 93.46        | 82.59        | 67.80        | 71.95        | 91.12        | 22.50        |
| TGNet [19]           | 94.08        | 61.34        | 93.54        | 0.00         | 90.83        | 81.57        | 65.26        | 62.98        | 88.73        | 7.85         |
| KPConv [36]          | 95.39        | 69.11        | 94.62        | 0.06         | <b>96.07</b> | 91.51        | <b>87.68</b> | 81.56        | 85.66        | 15.72        |
| MS-TGNet [33]        | 95.71        | 70.50        | 94.41        | 17.19        | 95.72        | 88.83        | 76.01        | 73.97        | <b>94.24</b> | 23.64        |
| diffConv [20]        | -            | 76.73        | 83.31        | 51.06        | 69.04        | 79.55        | 80.48        | <b>84.41</b> | 76.19        | <b>89.83</b> |
| <b>Ours</b>          | <b>97.06</b> | <b>79.76</b> | <b>97.42</b> | <b>69.56</b> | 94.79        | <b>94.96</b> | 78.21        | 83.35        | 91.54        | 28.21        |

Table 1. Quantitative results on Toronto-3D [33] dataset for semantic segmentation. We compare with different methods in terms of overall point accuracy (OA), mean per-class IoU (mIoU) and per-class mIoU.

| Methods         | Cat. mIoU   | Ins. mIoU   | aero | bag  | cap  | car  | chair | earphone | guitar | knife | lamp | laptop | motor | mug  | pistol | rocket | skateboard | table |
|-----------------|-------------|-------------|------|------|------|------|-------|----------|--------|-------|------|--------|-------|------|--------|--------|------------|-------|
| PointNet [29]   | 80.4        | 83.7        | 83.4 | 78.7 | 82.5 | 74.9 | 89.6  | 73.0     | 91.5   | 85.9  | 80.8 | 95.3   | 65.2  | 93.0 | 81.2   | 57.9   | 72.8       | 80.6  |
| PointNet++ [30] | 81.9        | 85.1        | 82.4 | 79.0 | 87.7 | 77.3 | 90.8  | 71.8     | 91.0   | 85.9  | 83.7 | 95.3   | 71.6  | 94.1 | 81.3   | 58.7   | 76.4       | 82.6  |
| PointCNN [18]   | 84.6        | 86.1        | 84.1 | 86.5 | 86.0 | 80.8 | 90.6  | 79.7     | 92.3   | 88.4  | 85.3 | 96.1   | 77.2  | 95.3 | 84.2   | 64.2   | 80.0       | 83.0  |
| RS-CNN [24]     | 84.0        | 86.2        | 83.5 | 84.8 | 88.8 | 79.6 | 91.2  | 81.1     | 91.6   | 88.4  | 86.0 | 96.0   | 73.7  | 94.1 | 83.4   | 60.5   | 77.7       | 83.6  |
| DGCNN [17]      | 82.3        | 85.2        | 84.0 | 83.4 | 86.7 | 77.8 | 90.6  | 74.7     | 91.2   | 87.5  | 82.8 | 95.7   | 66.3  | 94.9 | 81.1   | 63.5   | 74.5       | 82.6  |
| KPConv [36]     | 85.1        | 86.4        | 84.6 | 86.3 | 87.2 | 81.1 | 91.1  | 77.8     | 92.6   | 88.4  | 82.7 | 96.2   | 78.1  | 95.8 | 85.4   | 69.0   | 82.0       | 83.6  |
| DensePoint [23] | 84.2        | 86.4        | 84.0 | 85.4 | 90.0 | 79.2 | 91.1  | 81.6     | 91.5   | 87.5  | 84.7 | 95.9   | 74.3  | 94.6 | 82.9   | 64.6   | 76.8       | 83.7  |
| 3D-GCN [22]     | 82.1        | 85.1        | 83.1 | 84.0 | 86.6 | 77.5 | 90.3  | 74.1     | 90.0   | 86.4  | 83.8 | 95.6   | 66.8  | 94.8 | 81.3   | 59.6   | 75.7       | 82.8  |
| PACConv [41]    | 84.6        | 86.1        | 84.3 | 85.0 | 90.4 | 79.7 | 90.6  | 80.8     | 92.0   | 88.7  | 82.2 | 95.9   | 73.9  | 94.7 | 84.7   | 65.9   | 81.4       | 84.0  |
| Ours            | <b>85.3</b> | <b>87.0</b> | 85.3 | 87.3 | 89.1 | 82.3 | 92.2  | 80.5     | 92.3   | 88.5  | 85.2 | 96.1   | 78.5  | 96.1 | 85.2   | 64.5   | 78.9       | 83.7  |

Table 2. Quantitative results on ShapeNetPart [43].

ing with some sparse point cloud datasets such as ScanNetV2 [5]. Besides, the way we estimate the feature correlation is relatively primitive.

**Future work.** In the future, we will try to implement our approach on large outdoor datasets such as SemanticKITTI. We will explore the voxel-like processing techniques in graph construction to deal with the sparse point cloud better. To further improve the graph representation, we will try to explore a more delicate hybrid structure and design a more efficient way to estimate correlations between points.

| Methods                | mIoU        | mAcc       | OA          | ceiling | floor | wall | beam | column | window | door | table | chair | sofa | bookcase | board | clutter |
|------------------------|-------------|------------|-------------|---------|-------|------|------|--------|--------|------|-------|-------|------|----------|-------|---------|
| PointNet [29]          | 41.1        | 49.0       | -           | 88.8    | 97.3  | 69.8 | 0.1  | 3.9    | 46.3   | 10.8 | 59.0  | 52.6  | 5.9  | 40.3     | 26.4  | 33.2    |
| SegCloud [35]          | 48.9        | 57.4       | -           | 90.1    | 96.1  | 69.9 | 0.0  | 18.4   | 38.4   | 23.1 | 70.4  | 75.9  | 40.9 | 58.4     | 13.0  | 41.6    |
| PointCNN [18]          | 57.3        | 63.9       | 85.9        | 92.3    | 98.2  | 79.4 | 0.0  | 17.6   | 22.8   | 62.1 | 74.4  | 80.6  | 31.7 | 66.7     | 62.1  | 56.7    |
| SPGraph [15]           | 58.0        | 66.5       | 86.4        | 89.4    | 96.9  | 78.1 | 0.0  | 42.8   | 48.9   | 61.6 | 84.7  | 75.4  | 69.8 | 52.6     | 2.1   | 52.2    |
| HPEIN [13]             | 61.9        | 68.3       | 87.2        | 91.5    | 98.2  | 81.4 | 0.0  | 23.3   | 65.3   | 40.0 | 75.5  | 87.7  | 58.5 | 67.8     | 65.6  | 49.4    |
| MinkowskiNet [4]       | 65.4        | 71.7       | -           | 91.8    | 98.7  | 86.2 | 0.0  | 34.1   | 48.9   | 62.4 | 81.6  | 89.8  | 47.2 | 74.9     | 74.4  | 58.6    |
| KPConv [36]            | 67.1        | 72.8       | -           | 92.8    | 97.3  | 82.4 | 0.0  | 23.9   | 58.0   | 69.0 | 81.5  | 91.0  | 75.4 | 75.3     | 66.7  | 58.9    |
| JSENet [11]            | 67.7        | -          | -           | 93.8    | 97.0  | 83.0 | 0.0  | 23.2   | 61.3   | 71.6 | 89.9  | 79.8  | 75.6 | 72.3     | 72.7  | 60.4    |
| RandLA-Net [10]        | 62.4        | 71.4       | 87.2        | 91.1    | 95.6  | 80.2 | 0.0  | 24.7   | 62.3   | 47.7 | 76.2  | 83.7  | 60.2 | 71.1     | 65.7  | 53.8    |
| CloserLook3D [25]      | 66.9        | 72.1       | 90.0        | 94.8    | 98.4  | 82.5 | 0.0  | 25.5   | 51.3   | 70.9 | 92.1  | 81.9  | 76.7 | 70.1     | 64.5  | 61.2    |
| PAConv [41]            | 66.6        | 73.0       | -           | 94.6    | 98.6  | 82.4 | 0.0  | 26.4   | 58.0   | 60.0 | 89.7  | 80.4  | 74.3 | 69.8     | 73.5  | 57.7    |
| CGA-Net [26]           | 68.6        | -          | -           | 94.5    | 98.3  | 83.0 | 0.0  | 25.3   | 59.6   | 71.0 | 92.2  | 82.6  | 76.4 | 77.7     | 69.5  | 61.5    |
| PCT [9]                | 61.3        | 67.7       | -           | 92.5    | 98.4  | 80.6 | 0.0  | 19.4   | 61.6   | 48.0 | 76.6  | 85.2  | 46.2 | 67.7     | 67.9  | 52.3    |
| PointTrans. [46]       | 70.4        | 76.5       | 90.8        | 94.0    | 98.5  | 86.3 | 0.0  | 38.0   | 63.4   | 74.3 | 89.1  | 82.4  | 74.3 | 80.2     | 76.0  | 59.3    |
| CBL [34]               | 69.4        | 75.2       | 90.6        | 93.9    | 98.4  | 84.2 | 0.0  | 37.0   | 57.7   | 71.9 | 91.7  | 81.8  | 77.8 | 75.6     | 69.1  | 62.9    |
| FastPointTrans. [28]   | 68.7        | 77.1       | -           | 93.8    | 97.8  | 85.5 | 0.6  | 49.9   | 60.5   | 72.9 | 80.2  | 88.7  | 56.0 | 71.4     | 78.0  | 58.1    |
| Stratified Trans. [14] | 72.0        | 78.1       | <b>91.5</b> | 96.2    | 98.7  | 85.6 | 0.0  | 46.1   | 60.0   | 76.8 | 92.6  | 84.5  | 77.8 | 75.2     | 78.1  | 64.0    |
| RepSurf [32]           | 68.9        | 76.5       | 90.2        | 93.3    | 98.5  | 85.7 | 0.0  | 38.1   | 61.5   | 71.8 | 80.1  | 90.4  | 80.3 | 71.2     | 68.2  | 56.0    |
| HilbertNet [2]         | 70.9        | -          | -           | 94.6    | 97.8  | 88.9 | 0.0  | 37.6   | 64.1   | 73.8 | 88.4  | 85.4  | 73.5 | 82.7     | 74.7  | 60.1    |
| PointMixer [3]         | 71.4        | 77.4       | -           | 94.2    | 98.2  | 86.0 | 0.0  | 43.8   | 62.1   | 78.5 | 90.6  | 82.2  | 73.9 | 79.8     | 78.5  | 59.4    |
| Ours                   | <b>72.3</b> | 77.9       | 91.1        | 95.4    | 98.6  | 85.1 | 0.0  | 47.3   | 58.3   | 80.4 | 83.9  | 92.0  | 80.6 | 77.3     | 79.9  | 61.8    |
| Ours <sup>†</sup>      | 71.8 ± 0.5  | 77.5 ± 0.4 | 91.1 ± 0.1  | 94.6    | 98.6  | 86.3 | 0.0  | 51.7   | 62.8   | 79.0 | 84.5  | 91.8  | 83.5 | 77.0     | 82.4  | 61.0    |
|                        | 72.5 ± 0.8  | 78.5 ± 0.6 | 91.3 ± 0.3  |         |       |      |      |        |        |      |       |       |      |          |       |         |

Table 3. Quantitative results on S3DIS Area 5 dataset [1].

| Methods           | mIoU        | mAcc        | OA          | ceiling | floor | wall | beam | column | window | door | table | chair | sofa | bookcase | board | clutter |
|-------------------|-------------|-------------|-------------|---------|-------|------|------|--------|--------|------|-------|-------|------|----------|-------|---------|
| PointNet [29]     | 47.6        | 66.2        | 78.6        | 88.0    | 88.7  | 69.3 | 42.4 | 23.1   | 47.5   | 51.6 | 54.1  | 42.0  | 9.6  | 38.2     | 29.4  | 35.2    |
| RSNet [12]        | 56.5        | 66.5        | -           | 92.5    | 92.8  | 78.6 | 32.8 | 34.4   | 51.6   | 68.1 | 59.7  | 60.1  | 16.4 | 50.2     | 44.9  | 52.0    |
| SPGraph [15]      | 62.1        | 73.0        | 86.4        | 89.9    | 95.1  | 76.4 | 62.8 | 47.1   | 55.3   | 68.4 | 73.5  | 69.2  | 63.2 | 45.9     | 8.7   | 52.9    |
| PointCNN [18]     | 65.4        | 75.6        | 88.1        | 94.8    | 97.3  | 75.8 | 63.3 | 51.7   | 58.4   | 57.2 | 71.6  | 69.1  | 39.1 | 61.2     | 52.2  | 58.6    |
| PointWeb [45]     | 66.7        | 76.2        | 87.3        | 93.5    | 94.2  | 80.8 | 52.4 | 41.3   | 64.9   | 68.1 | 71.4  | 67.1  | 50.3 | 62.7     | 62.2  | 58.5    |
| ShellNet [44]     | 66.8        | -           | 87.1        | 90.2    | 93.6  | 79.9 | 60.4 | 44.1   | 64.9   | 52.9 | 71.6  | 84.7  | 53.8 | 64.6     | 48.6  | 59.4    |
| KPConv [36]       | 70.6        | 79.1        | -           | 93.6    | 92.4  | 83.1 | 63.9 | 54.3   | 66.1   | 76.6 | 57.8  | 64.0  | 69.3 | 74.9     | 61.3  | 60.3    |
| FPCConv [21]      | 68.7        | -           | -           | 94.8    | 97.5  | 82.6 | 42.8 | 41.8   | 58.6   | 73.4 | 81.0  | 71.0  | 61.9 | 59.8     | 64.2  | 64.2    |
| RandLA-Net [10]   | 70.0        | 82.0        | 88.0        | 93.1    | 96.1  | 80.6 | 62.4 | 48.0   | 64.4   | 69.4 | 69.4  | 76.4  | 60.0 | 64.2     | 65.9  | 60.1    |
| SCF-Net [6]       | 71.6        | 82.7        | 88.4        | 93.3    | 96.4  | 80.9 | 64.9 | 47.4   | 64.5   | 70.1 | 71.4  | 81.6  | 67.2 | 64.4     | 67.5  | 60.9    |
| PAConv [41]       | 69.3        | 78.7        | -           | 94.3    | 93.5  | 82.8 | 56.9 | 45.7   | 65.2   | 74.9 | 59.7  | 74.6  | 67.4 | 61.8     | 65.8  | 58.4    |
| BAAF [31]         | 72.2        | 83.1        | 88.9        | 93.3    | 96.8  | 81.6 | 61.9 | 49.5   | 65.4   | 73.3 | 72.0  | 83.7  | 67.5 | 64.3     | 67.0  | 62.4    |
| PointTrans. [46]  | 73.5        | 81.9        | 90.2        | 94.3    | 97.5  | 84.7 | 55.6 | 58.1   | 66.1   | 78.2 | 77.6  | 74.1  | 67.3 | 71.2     | 65.7  | 64.8    |
| CBL [34]          | 73.1        | 79.4        | 89.6        | 94.1    | 94.2  | 85.5 | 50.4 | 58.8   | 70.3   | 78.3 | 75.7  | 75.0  | 71.8 | 74.0     | 60.0  | 62.4    |
| Ours              | <b>77.7</b> | <b>85.1</b> | <b>91.7</b> | 95.6    | 97.7  | 86.1 | 64.3 | 66.1   | 69.8   | 82.0 | 77.4  | 85.0  | 77.0 | 72.0     | 69.3  | 68.2    |
| Ours <sup>†</sup> | <b>78.4</b> | <b>86.2</b> | <b>91.8</b> | 94.8    | 97.8  | 86.7 | 63.2 | 69.7   | 70.5   | 81.4 | 76.6  | 89.4  | 78.5 | 71.8     | 70.6  | 68.5    |

Table 4. Quantitative results on S3DIS [1] with 6-fold cross validation.

| Methods           | Input | Val mIoU | Test mIoU | bath | bed  | bksf | cab  | chair | cntr | curt | desk | door | floor | othr | pic  | ref  | show | sink | sofa | tab  | toil | wall | wind |
|-------------------|-------|----------|-----------|------|------|------|------|-------|------|------|------|------|-------|------|------|------|------|------|------|------|------|------|------|
| PointNet++ [30]   | point | 53.5     | 55.7      | 73.5 | 66.1 | 68.6 | 49.1 | 74.4  | 39.2 | 53.9 | 45.1 | 37.5 | 94.6  | 37.6 | 20.5 | 40.3 | 35.6 | 55.3 | 64.3 | 49.7 | 82.4 | 75.6 | 51.5 |
| PointCNN [18]     | point | -        | 45.8      | 57.7 | 61.1 | 35.6 | 32.1 | 71.5  | 29.9 | 37.6 | 32.8 | 31.9 | 94.4  | 28.5 | 16.4 | 21.6 | 22.9 | 48.4 | 54.5 | 45.6 | 75.5 | 70.9 | 47.5 |
| PointConv [39]    | point | 61.0     | 66.6      | 78.1 | 75.9 | 69.9 | 64.4 | 82.2  | 47.5 | 77.9 | 56.4 | 50.4 | 95.3  | 42.8 | 20.3 | 58.6 | 75.4 | 66.1 | 75.3 | 58.8 | 90.2 | 81.3 | 64.2 |
| SparseConvNet [8] | voxel | 69.3     | 72.5      | 64.7 | 82.1 | 84.6 | 72.1 | 86.9  | 53.3 | 75.4 | 60.3 | 61.4 | 95.5  | 57.2 | 32.5 | 71.0 | 87.0 | 72.4 | 82.3 | 62.8 | 93.4 | 86.5 | 68.3 |
| KPConv [36]       | point | 69.2     | 68.4      | 84.7 | 75.8 | 78.4 | 64.7 | 81.4  | 47.3 | 77.2 | 60.5 | 59.4 | 93.5  | 45.0 | 18.1 | 58.7 | 80.5 | 69.0 | 78.5 | 61.4 | 88.2 | 81.9 | 63.2 |
| MinkowskiNet [4]  | voxel | 72.2     | 73.6      | 85.9 | 81.8 | 83.2 | 70.9 | 84.0  | 52.1 | 85.3 | 66.0 | 64.3 | 95.1  | 54.4 | 28.6 | 73.1 | 89.3 | 67.5 | 77.2 | 68.3 | 87.4 | 85.2 | 72.7 |
| SegGCN [16]       | point | -        | 58.9      | 83.3 | 73.1 | 53.9 | 51.4 | 78.9  | 44.8 | 46.7 | 57.3 | 48.4 | 93.6  | 39.6 | 6.1  | 50.1 | 50.7 | 59.4 | 70.0 | 56.3 | 87.4 | 77.1 | 49.3 |
| RandLA-Net [10]   | point | -        | 64.5      | 77.8 | 73.1 | 69.9 | 57.7 | 82.9  | 44.6 | 73.6 | 47.7 | 52.3 | 94.5  | 45.4 | 26.9 | 48.4 | 74.9 | 61.8 | 73.8 | 59.9 | 82.7 | 79.2 | 62.1 |
| PointASNL [42]    | point | 63.5     | 66.6      | 70.3 | 78.1 | 75.1 | 65.5 | 83.0  | 47.1 | 76.9 | 47.4 | 53.7 | 95.1  | 47.5 | 27.9 | 63.5 | 69.8 | 67.5 | 75.1 | 55.3 | 81.6 | 80.6 | 70.3 |
| JSENet [11]       | point | -        | 69.9      | 88.1 | 76.2 | 82.1 | 66.7 | 80.0  | 52.2 | 79.2 | 61.3 | 60.7 | 93.5  | 49.2 | 20.5 | 57.6 | 85.3 | 69.1 | 75.8 | 65.2 | 87.2 | 82.8 | 64.9 |
| RFCR [7]          | point | -        | 70.2      | 88.9 | 74.5 | 81.3 | 67.2 | 81.8  | 49.3 | 81.5 | 62.3 | 61.0 | 94.7  | 47.0 | 24.9 | 59.4 | 84.8 | 70.5 | 77.9 | 64.6 | 89.2 | 82.3 | 61.1 |
| CBL [34]          | point | -        | 70.5      | 76.9 | 77.5 | 80.9 | 68.7 | 82.0  | 43.9 | 81.2 | 66.1 | 59.1 | 94.5  | 51.5 | 17.1 | 63.3 | 85.6 | 72.0 | 79.6 | 66.8 | 88.9 | 84.7 | 68.9 |
| Ours <sup>†</sup> | point | 73.4     | 71.8      | 84.5 | 75.1 | 81.6 | 71.4 | 85.1  | 52.8 | 81.9 | 62.3 | 60.3 | 95.5  | 52.9 | 28.0 | 65.9 | 86.8 | 71.3 | 78.5 | 60.1 | 90.0 | 84.4 | 68.1 |

Table 5. Quantitative results on ScanNetV2 [5].

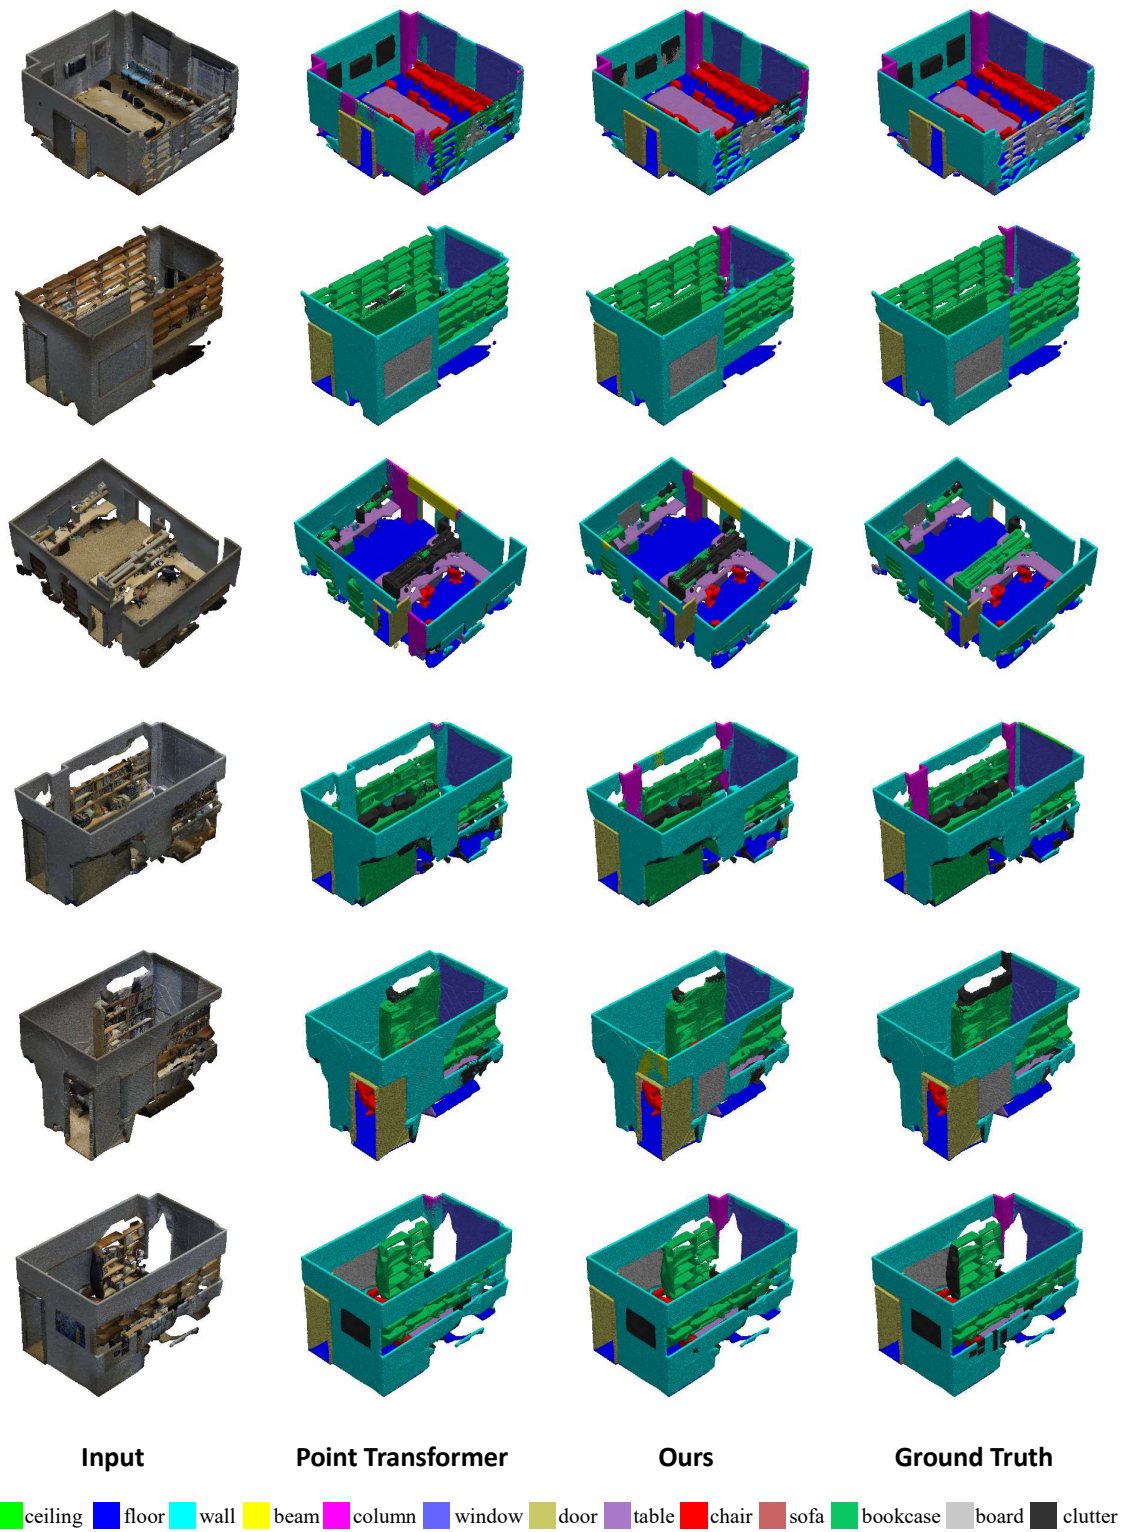

Figure 2. More visualization compared with PointTransformer [46]. Zoom-in for a better view.



## References

- [1] Iro Armeni, Ozan Sener, Amir R. Zamir, Helen Jiang, Ioannis Brilakis, Martin Fischer, and Silvio Savarese. 3d semantic parsing of large-scale indoor spaces. In *Proceedings of the IEEE Conference on Computer Vision and Pattern Recognition (CVPR)*, June 2016. 1, 3
- [2] Wanli Chen, Xinge Zhu, Guojin Chen, and Bei Yu. Efficient point cloud analysis using hilbert curve. In *European Conference on Computer Vision*, pages 730–747. Springer, 2022. 3
- [3] Jaesung Choe, Chunghyun Park, Francois Rameau, Jaesik Park, and In So Kweon. Pointmixer: Mlp-mixer for point cloud understanding. In *European Conference on Computer Vision*. Springer, 2022. 3
- [4] Christopher Choy, JunYoung Gwak, and Silvio Savarese. 4d spatio-temporal convnets: Minkowski convolutional neural networks. In *Proceedings of the IEEE/CVF Conference on Computer Vision and Pattern Recognition (CVPR)*, June 2019. 3
- [5] Angela Dai, Angel X. Chang, Manolis Savva, Maciej Halber, Thomas Funkhouser, and Matthias Niessner. Scannet: Richly-annotated 3d reconstructions of indoor scenes. In *Proceedings of the IEEE Conference on Computer Vision and Pattern Recognition (CVPR)*, July 2017. 1, 2, 3
- [6] Siqi Fan, Qiulei Dong, Fenghua Zhu, Yisheng Lv, Peijun Ye, and Fei-Yue Wang. Scf-net: Learning spatial contextual features for large-scale point cloud segmentation. In *Proceedings of the IEEE/CVF Conference on Computer Vision and Pattern Recognition (CVPR)*, pages 14504–14513, June 2021. 3
- [7] Jingyu Gong, Jiachen Xu, Xin Tan, Haichuan Song, Yanyun Qu, Yuan Xie, and Lizhuang Ma. Omni-supervised point cloud segmentation via gradual receptive field component reasoning. In *Proceedings of the IEEE/CVF Conference on Computer Vision and Pattern Recognition (CVPR)*, pages 11673–11682, June 2021. 3
- [8] Benjamin Graham, Martin Engelcke, and Laurens van der Maaten. 3d semantic segmentation with submanifold sparse convolutional networks. In *Proceedings of the IEEE Conference on Computer Vision and Pattern Recognition (CVPR)*, June 2018. 3
- [9] Meng-Hao Guo, Jun-Xiong Cai, Zheng-Ning Liu, Tai-Jiang Mu, Ralph R. Martin, and Shi-Min Hu. Pct: Point cloud transformer. *Computational Visual Media*, 7(2):187–199, Apr 2021. 3
- [10] Qingyong Hu, Bo Yang, Linhai Xie, Stefano Rosa, Yulan Guo, Zhihua Wang, Niki Trigoni, and Andrew Markham. Randla-net: Efficient semantic segmentation of large-scale point clouds. In *Proceedings of the IEEE/CVF Conference on Computer Vision and Pattern Recognition (CVPR)*, June 2020. 3
- [11] Zeyu Hu, Mingmin Zhen, Xuyang Bai, Hongbo Fu, and Chiew-lan Tai. Jsenet: Joint semantic segmentation and edge detection network for 3d point clouds. In *European Conference on Computer Vision*, pages 222–239. Springer, 2020. 3
- [12] Qianguai Huang, Weiyue Wang, and Ulrich Neumann. Recurrent slice networks for 3d segmentation of point clouds. In *Proceedings of the IEEE Conference on Computer Vision and Pattern Recognition (CVPR)*, June 2018. 3
- [13] Li Jiang, Hengshuang Zhao, Shu Liu, Xiaoyong Shen, Chi-Wing Fu, and Jiaya Jia. Hierarchical point-edge interaction network for point cloud semantic segmentation. In *Proceedings of the IEEE/CVF International Conference on Computer Vision (ICCV)*, October 2019. 3
- [14] Xin Lai, Jianhui Liu, Li Jiang, Liwei Wang, Hengshuang Zhao, Shu Liu, Xiaojuan Qi, and Jiaya Jia. Stratified transformer for 3d point cloud segmentation. In *Proceedings of the IEEE/CVF Conference on Computer Vision and Pattern Recognition (CVPR)*, pages 8500–8509, June 2022. 1, 3
- [15] Loic Landrieu and Martin Simonovsky. Large-scale point cloud semantic segmentation with superpoint graphs. In *Proceedings of the IEEE Conference on Computer Vision and Pattern Recognition (CVPR)*, June 2018. 3
- [16] Huan Lei, Naveed Akhtar, and Ajmal Mian. Seggcn: Efficient 3d point cloud segmentation with fuzzy spherical kernel. In *Proceedings of the IEEE/CVF Conference on Computer Vision and Pattern Recognition (CVPR)*, June 2020. 3
- [17] Guohao Li, Matthias Müller, Guocheng Qian, Itzel Carolina Delgadillo Perez, Abdullellah Abualshour, Ali Kassem Thabet, and Bernard Ghanem. Deepgcns: Making gcns go as deep as cnns. *IEEE Transactions on Pattern Analysis and Machine Intelligence*, 2021. 2
- [18] Yangyan Li, Rui Bu, Mingchao Sun, Wei Wu, Xinhan Di, and Baoquan Chen. Pointcnn: Convolution on x-transformed points. In *Advances in Neural Information Processing Systems*, volume 31, 2018. 2, 3
- [19] Ying Li, Lingfei Ma, Zilong Zhong, Dongpu Cao, and Jonathan Li. Tgnet: Geometric graph cnn on 3-d point cloud segmentation. *IEEE Transactions on Geoscience and Remote Sensing*, 58(5):3588–3600, 2019. 1, 2
- [20] Manxi Lin and Aasa Feragen. diffconv: Analyzing irregular point clouds with an irregular view. In *European Conference on Computer Vision*, 2022. 1, 2
- [21] Yiqun Lin, Zizheng Yan, Haibin Huang, Dong Du, Ligang Liu, Shuguang Cui, and Xiaoguang Han. Fpconv: Learning local flattening for point convolution. In *Proceedings of the IEEE/CVF Conference on Computer Vision and Pattern Recognition (CVPR)*, June 2020. 3
- [22] Zhi-Hao Lin, Sheng-Yu Huang, and Yu-Chiang Frank Wang. Convolution in the cloud: Learning deformable kernels in 3d graph convolution networks for point cloud analysis. In *Proceedings of the IEEE/CVF Conference on Computer Vision and Pattern Recognition (CVPR)*, June 2020. 2
- [23] Yongcheng Liu, Bin Fan, Gaofeng Meng, Jiwen Lu, Shiming Xiang, and Chunhong Pan. Densepoint: Learning densely contextual representation for efficient point cloud processing. In *Proceedings of the IEEE/CVF International Conference on Computer Vision (ICCV)*, October 2019. 2
- [24] Yongcheng Liu, Bin Fan, Shiming Xiang, and Chunhong Pan. Relation-shape convolutional neural network for point cloud analysis. In *Proceedings of the IEEE/CVF Conference on Computer Vision and Pattern Recognition (CVPR)*, June 2019. 2

- [25] Ze Liu, Han Hu, Yue Cao, Zheng Zhang, and Xin Tong. A closer look at local aggregation operators in point cloud analysis. In *European Conference on Computer Vision*, pages 326–342. Springer, 2020. 3
- [26] Tao Lu, Limin Wang, and Gangshan Wu. Cga-net: Category guided aggregation for point cloud semantic segmentation. In *Proceedings of the IEEE/CVF Conference on Computer Vision and Pattern Recognition (CVPR)*, pages 11693–11702, June 2021. 3
- [27] Lingfei Ma, Ying Li, Jonathan Li, Weikai Tan, Yongtao Yu, and Michael A. Chapman. Multi-scale point-wise convolutional neural networks for 3d object segmentation from lidar point clouds in large-scale environments. *IEEE Transactions on Intelligent Transportation Systems*, 22(2):821–836, 2021. 2
- [28] Chunghyun Park, Yoonwoo Jeong, Minsu Cho, and Jaesik Park. Fast point transformer. In *Proceedings of the IEEE/CVF Conference on Computer Vision and Pattern Recognition (CVPR)*, pages 16949–16958, June 2022. 3
- [29] Charles R. Qi, Hao Su, Kaichun Mo, and Leonidas J. Guibas. Pointnet: Deep learning on point sets for 3d classification and segmentation. In *Proceedings of the IEEE Conference on Computer Vision and Pattern Recognition (CVPR)*, pages 652–660, July 2017. 2, 3
- [30] Charles Ruizhongtai Qi, Li Yi, Hao Su, and Leonidas J. Guibas. Pointnet++: Deep hierarchical feature learning on point sets in a metric space. In *Advances in Neural Information Processing Systems*, volume 30, 2017. 2, 3
- [31] Shi Qiu, Saeed Anwar, and Nick Barnes. Semantic segmentation for real point cloud scenes via bilateral augmentation and adaptive fusion. In *Proceedings of the IEEE/CVF Conference on Computer Vision and Pattern Recognition (CVPR)*, pages 1757–1767, June 2021. 3
- [32] Haoxi Ran, Jun Liu, and Chengjie Wang. Surface representation for point clouds. In *Proceedings of the IEEE/CVF Conference on Computer Vision and Pattern Recognition (CVPR)*, pages 18942–18952, June 2022. 3
- [33] Weikai Tan, Nannan Qin, Lingfei Ma, Ying Li, Jing Du, Guorong Cai, Ke Yang, and Jonathan Li. Toronto-3d: A large-scale mobile lidar dataset for semantic segmentation of urban roadways. In *Proceedings of the IEEE/CVF Conference on Computer Vision and Pattern Recognition (CVPR) Workshops*, June 2020. 1, 2
- [34] Liyao Tang, Yibing Zhan, Zhe Chen, Baosheng Yu, and Dacheng Tao. Contrastive boundary learning for point cloud segmentation. In *Proceedings of the IEEE/CVF Conference on Computer Vision and Pattern Recognition (CVPR)*, pages 8489–8499, June 2022. 3
- [35] Lyne Tchapmi, Christopher Choy, Iro Armeni, JunYoung Gwak, and Silvio Savarese. Segcloud: Semantic segmentation of 3d point clouds. In *International Conference on 3D Vision (3DV)*, pages 537–547. IEEE, 2017. 3
- [36] Hugues Thomas, Charles R. Qi, Jean-Emmanuel Deschaud, Beatriz Marcotequi, Francois Goulette, and Leonidas J. Guibas. Kpconv: Flexible and deformable convolution for point clouds. In *Proceedings of the IEEE/CVF International Conference on Computer Vision (ICCV)*, October 2019. 2, 3
- [37] Mikaela Angelina Uy, Quang-Hieu Pham, Binh-Son Hua, Duc Thanh Nguyen, and Sai-Kit Yeung. Revisiting point cloud classification: A new benchmark dataset and classification model on real-world data. In *International Conference on Computer Vision (ICCV)*, 2019. 1
- [38] Yue Wang, Yongbin Sun, Ziwei Liu, Sanjay E. Sarma, Michael M. Bronstein, and Justin M. Solomon. Dynamic graph cnn for learning on point clouds. *Acm Transactions On Graphics (tog)*, 38(5):1–12, 2019. 2
- [39] Wenxuan Wu, Zhongang Qi, and Li Fuxin. Pointconv: Deep convolutional networks on 3d point clouds. In *Proceedings of the IEEE/CVF Conference on Computer Vision and Pattern Recognition (CVPR)*, pages 9621–9630, 2019. 3
- [40] Tiange Xiang, Chaoyi Zhang, Yang Song, Jianhui Yu, and Weidong Cai. Walk in the cloud: Learning curves for point clouds shape analysis. In *Proceedings of the IEEE/CVF International Conference on Computer Vision (ICCV)*, pages 915–924, October 2021. 1
- [41] Mutian Xu, Runyu Ding, Hengshuang Zhao, and Xiaojuan Qi. Paconv: Position adaptive convolution with dynamic kernel assembling on point clouds. In *Proceedings of the IEEE/CVF Conference on Computer Vision and Pattern Recognition (CVPR)*, pages 3173–3182, June 2021. 2, 3
- [42] Xu Yan, Chaoda Zheng, Zhen Li, Sheng Wang, and Shuguang Cui. Pointasnl: Robust point clouds processing using nonlocal neural networks with adaptive sampling. In *Proceedings of the IEEE/CVF Conference on Computer Vision and Pattern Recognition (CVPR)*, June 2020. 3
- [43] Li Yi, Vladimir G. Kim, Duygu Ceylan, I-Chao Shen, Mengyan Yan, Hao Su, Cewu Lu, Qixing Huang, Alla Sheffer, and Leonidas Guibas. A scalable active framework for region annotation in 3d shape collections. *ACM Transactions on Graphics (ToG)*, 35(6):1–12, 2016. 1, 2
- [44] Zhiyuan Zhang, Binh-Son Hua, and Sai-Kit Yeung. Shellnet: Efficient point cloud convolutional neural networks using concentric shells statistics. In *Proceedings of the IEEE/CVF International Conference on Computer Vision (ICCV)*, October 2019. 3
- [45] Hengshuang Zhao, Li Jiang, Chi-Wing Fu, and Jiaya Jia. Pointweb: Enhancing local neighborhood features for point cloud processing. In *Proceedings of the IEEE/CVF Conference on Computer Vision and Pattern Recognition (CVPR)*, June 2019. 3
- [46] Hengshuang Zhao, Li Jiang, Jiaya Jia, Philip H.S. Torr, and Vladlen Koltun. Point transformer. In *Proceedings of the IEEE/CVF International Conference on Computer Vision (ICCV)*, pages 16259–16268, October 2021. 3, 4
